# Supplementary material for: Disentangling the rates of carbonyl sulfide (COS) production and consumption and their dependency on soil properties across biomes and land use types
Source: Copernicus journal article supplement (doi:10.5194/acp-18-9425-2018), 2018-07-05
Supplement: Supplementary file 1 [file acp-18-9425-2018-supplement.pdf]

Supplement of Atmos. Chem. Phys., 18, 9425–9440, 2018  
<https://doi.org/10.5194/acp-18-9425-2018-supplement>  
© Author(s) 2018. This work is distributed under  
the Creative Commons Attribution 4.0 License.

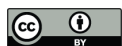

*Supplement of*

## **Disentangling the rates of carbonyl sulfide (COS) production and consumption and their dependency on soil properties across biomes and land use types**

**Aurore Kaisermann et al.**

*Correspondence to:* Aurore Kaisermann (aurore.kaisermann@inra.fr)

The copyright of individual parts of the supplement might differ from the CC BY 4.0 License.

| SiteID         | pH   | Redox    | Bulk density                         | Vol.Water | WFPS                  | Clay                  | Silt                  | Sand                  | Soil C                | Soil N                | CaCO <sub>3</sub>     | Phosphate | MBC                   | MBN                   | CO <sub>2</sub> dried soil |
|----------------|------|----------|--------------------------------------|-----------|-----------------------|-----------------------|-----------------------|-----------------------|-----------------------|-----------------------|-----------------------|-----------|-----------------------|-----------------------|----------------------------|
| (-)            | (mV) | (g.cm-3) | (cm <sup>3</sup> .cm <sup>-3</sup> ) | (-)       | (g.kg <sup>-1</sup> ) | (ugP.mL)  | (ug.g <sup>-1</sup> ) | (ug.g <sup>-1</sup> ) | (umol.m2.s <sup>-1</sup> ) |
| FI-Hyy         | 4.4  | 410      | 0.51                                 | 0.23      | 0.28                  | 138                   | 317                   | 545                   | 98                    | 2.73                  | 20                    | 0.17      | 1056                  | 120                   | 0.0                        |
| FI-Var1        | 5.2  | 305      | 0.76                                 | 0.11      | 0.16                  | 44                    | 168                   | 788                   | 28                    | 0.89                  | 14                    | 0.00      | 135                   | 14                    | 0.3                        |
| FI-Var2        | 4.9  | 341      | 0.76                                 | 0.15      | 0.21                  | NA                    | NA                    | NA                    | NA                    | NA                    | NA                    | NA        | 546                   | 73                    | 0.3                        |
| SE-Hyl         | 3.9  | 433      | 0.52                                 | 0.12      | 0.15                  | 142                   | 346                   | 512                   | 105                   | 4.11                  | 20                    | 0.69      | 851                   | 110                   | 0.0                        |
| SE-Nor         | 4.6  | 309      | 0.56                                 | 0.20      | 0.26                  | 133                   | 260                   | 607                   | 74                    | 2.36                  | 20                    | 0.52      | 1139                  | 120                   | 0.0                        |
| SE-Ros2        | 4.9  | 314      | 0.85                                 | 0.12      | 0.18                  | 35                    | 148                   | 817                   | 16                    | 0.38                  | 14                    | 0.01      | 100                   | 9                     | 0.0                        |
| <b>SE-Ros1</b> | 4.3  | 348      | 0.81                                 | 0.12      | 0.17                  | 40                    | 303                   | 657                   | 21                    | 0.79                  | 20                    | 0.00      | 107                   | 8                     | 0.0                        |
| SE-Sva         | 4.2  | 400      | 0.54                                 | 0.21      | 0.27                  | 86                    | 282                   | 632                   | 85                    | 2.17                  | 7                     | 1.32      | 918                   | 115                   | 0.1                        |
| ES-Amo         | 8.5  | 239      | 0.93                                 | 0.12      | 0.19                  | 145                   | 345                   | 510                   | 28                    | 1.49                  | 4                     | 0.12      | 1030                  | 110                   | -0.4                       |
| ES-Bal         | 8.5  | 180      | 0.89                                 | 0.10      | 0.15                  | 180                   | 275                   | 545                   | 20                    | 1.56                  | 9                     | 0.11      | 650                   | 57                    | -0.3                       |
| ES-Ube1        | 8.6  | 168      | 0.86                                 | 0.12      | 0.17                  | 548                   | 401                   | 51                    | 71                    | 1.51                  | 16                    | 0.13      | 835                   | 70                    | 0.0                        |
| ES-Ube2        | 8.4  | 185      | 0.99                                 | 0.12      | 0.19                  | NA                    | NA                    | NA                    | NA                    | NA                    | NA                    | NA        | 671                   | 47                    | 0.0                        |
| IL-Reh         | 7.9  | 191      | 1.01                                 | 0.15      | 0.24                  | 147                   | 67                    | 786                   | 14                    | 0.79                  | 13                    | 0.16      | 362                   | 31                    | -0.1                       |
| IL-Yat         | 8.6  | 192      | 0.87                                 | 0.16      | 0.24                  | 288                   | 490                   | 222                   | 58                    | 1.92                  | 9                     | 0.25      | 1214                  | 142                   | -0.3                       |
| PT-Cor         | 5.8  | 257      | 1.13                                 | 0.11      | 0.20                  | 37                    | 155                   | 808                   | 12                    | 0.68                  | 1                     | 0.34      | 165                   | 16                    | 0.0                        |
| PT-Mit         | 6.0  | 257      | 0.80                                 | 0.11      | 0.15                  | 40                    | 85                    | 875                   | 17                    | 0.95                  | 20                    | 0.34      | 479                   | 52                    | 0.0                        |
| CH-Cha         | 5.5  | 371      | 0.70                                 | 0.16      | 0.21                  | 282                   | 441                   | 277                   | 25                    | 2.61                  | 14                    | 1.10      | 961                   | 84                    | 0.0                        |
| CH-Dav         | 4.2  | 407      | 0.33                                 | 0.21      | 0.24                  | 221                   | 254                   | 525                   | 144                   | 5.34                  | 14                    | 0.17      | 1450                  | 145                   | 0.0                        |
| CH-Fru         | 4.8  | 377      | 0.74                                 | 0.18      | 0.26                  | 238                   | 446                   | 316                   | 42                    | 4.07                  | 1                     | 0.14      | 903                   | 98                    | 0.0                        |
| CH-Lae         | 6.3  | 277      | 0.75                                 | 0.19      | 0.27                  | 423                   | 425                   | 152                   | 37                    | 2.81                  | 3                     | 0.16      | 724                   | 10                    | 0.0                        |
| CH-Oe2         | 6.9  | 248      | 0.89                                 | 0.17      | 0.26                  | 416                   | 469                   | 115                   | 28                    | 2.77                  | 6                     | 0.31      | 552                   | 43                    | -0.3                       |
| DE-Hai         | 5.7  | 292      | 0.87                                 | 0.25      | 0.37                  | 476                   | 485                   | 39                    | 39                    | 3.05                  | 14                    | 0.10      | 677                   | -17                   | 0.0                        |
| DE-Lei         | 5.0  | 380      | 0.88                                 | 0.15      | 0.23                  | 187                   | 772                   | 41                    | 31                    | 2.33                  | 7                     | 0.03      | 542                   | 55                    | 0.0                        |
| DK-Sor         | 4.2  | 371      | 0.63                                 | 0.17      | 0.22                  | 149                   | 234                   | 617                   | 56                    | 2.97                  | 14                    | 0.26      | 572                   | 58                    | 0.1                        |
| FR-Hes         | 5.1  | 331      | 0.87                                 | 0.18      | 0.26                  | 244                   | 610                   | 146                   | 22                    | 1.56                  | 20                    | 0.01      | 509                   | 52                    | 0.0                        |
| <b>FR-Lqu1</b> | 4.2  | 420      | 0.54                                 | 0.16      | 0.20                  | 179                   | 594                   | 227                   | 95                    | 9.07                  | 1                     | 0.02      | 1012                  | 28                    | 0.0                        |
| FR-Lqu2        | 4.9  | 383      | 0.55                                 | 0.22      | 0.28                  | 206                   | 579                   | 215                   | 113                   | 10.23                 | 1                     | 0.03      | 2302                  | 190                   | 0.0                        |

**Table S1:** Table summarising the soil properties for the 27 soils used in this study (n=3). Vol.Water is the volumetric water content, Soil C and Soil N are the soil total C and N concentrations, MBC and MBN are the microbial biomass C and N, CO<sub>2</sub> dried soil are the CO<sub>2</sub> fluxes measured using the method 1 on air-dried soils.

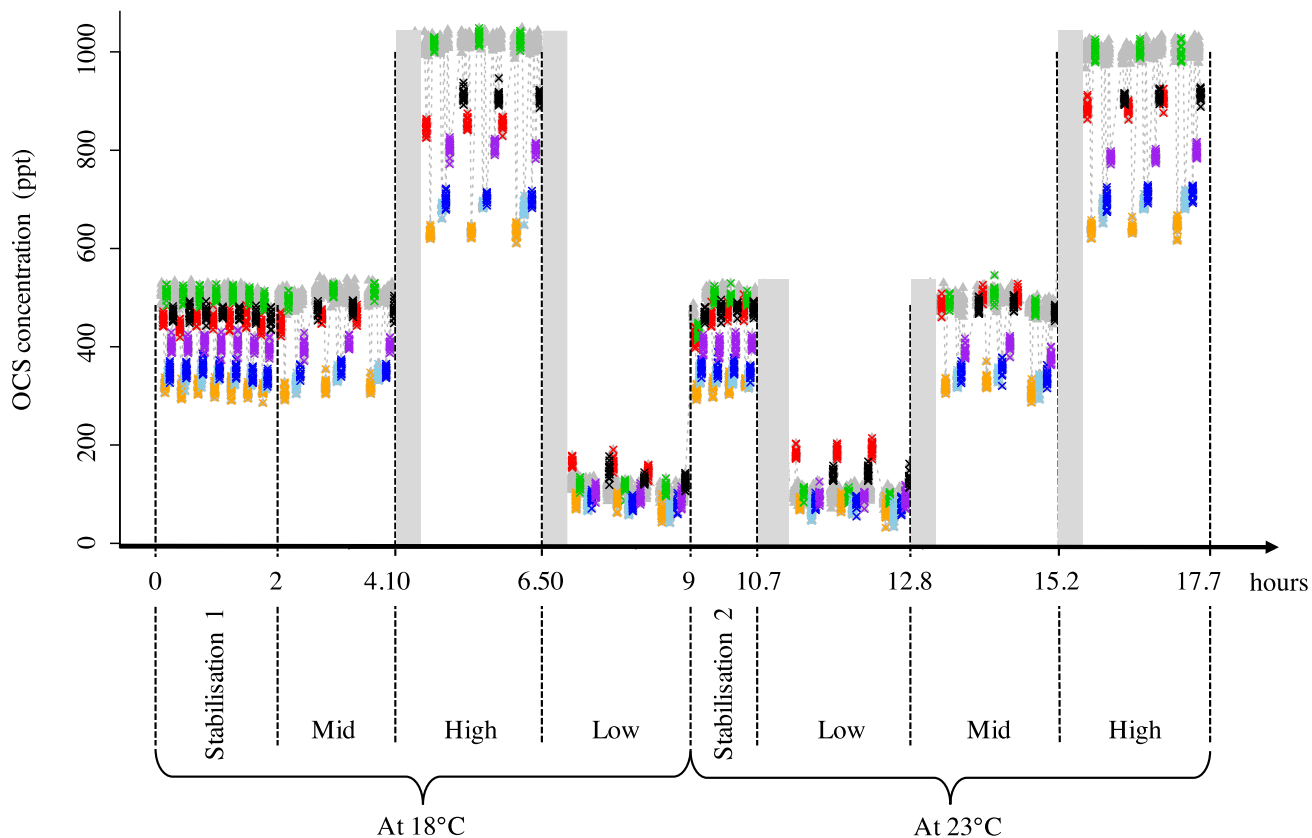

**Figure S2:** Sequence of gas exchange measurements programmed to measure the net COS exchange for Method 2. The measurement of COS concentration was done for gas entering in the jars (grey cross) in alternating for gas exiting the six jars with soils (red, orange, skyblue, blue, purple and black) and the empty jar (green). The measurement was realised every second for 120 seconds, only the last 15 seconds (each single cross) were used for average. The measurements were done three times for each jar, at three levels of COS concentration entering in the pots (Low, Mid and High) at two temperature levels (18°C and 23°C). The jars were connected to the measurement system for two hours to equilibrate gas between soil and atmosphere (Stabilisation 1). The measurements done during the 30 minutes after changing the level of COS concentration (grey rectangle) and 1h45 after changing the temperature in the climatic chamber (Stabilisation 2) were not used for analysis to assure sufficient time to have stable gas fluxes.

10

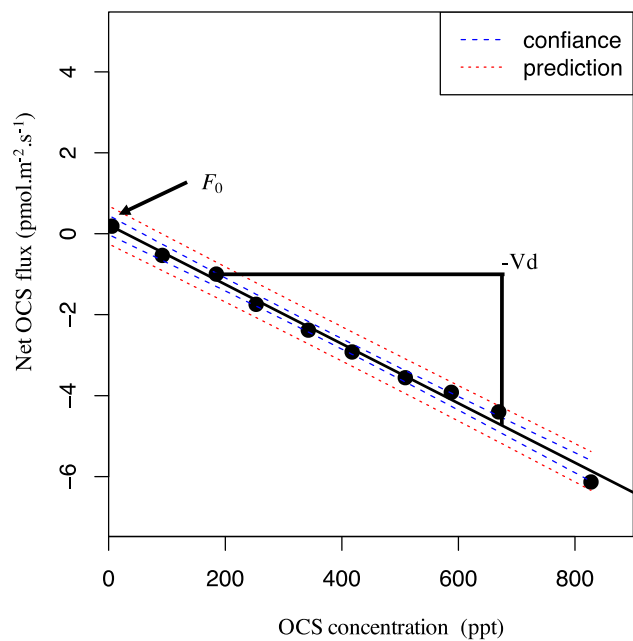

**Figure S3:** Determination of the gross production rate when the net COS flux at zero of COS concentration ( $F_0$ ) and the pseudo-first order uptake rate constant ( $Vd$ ) by measuring the flux of COS as function of the COS concentration over soil in a flow-through system (adapted from Conrad 1994). Black line is the linear model, blue line is the confidence interval and red lines is the prediction interval.

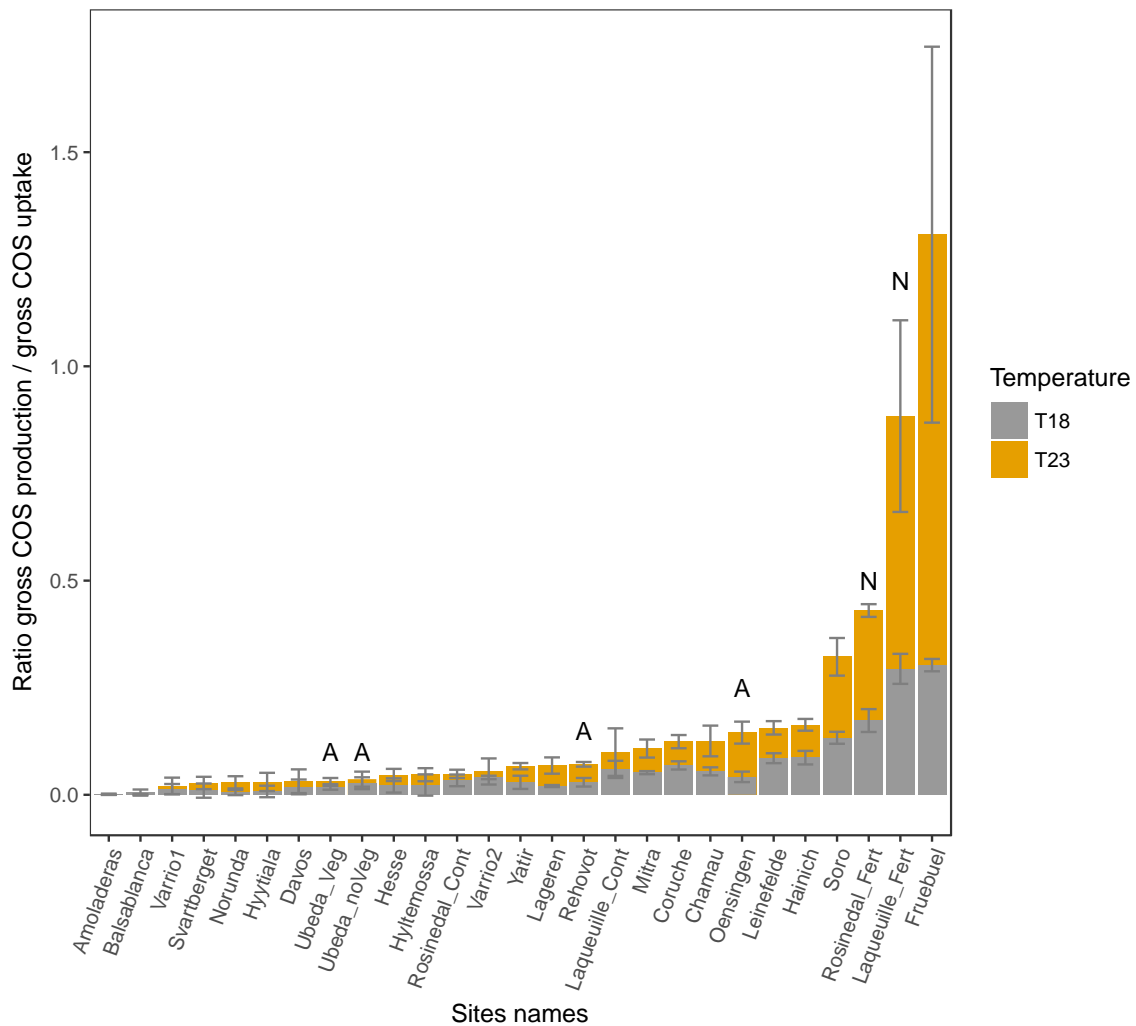

**Figure S4:** The ratio of gross COS source to the gross COS uptake in the 27 soils ( $n=3 \pm sd$ ) at 18°C and 23°C. Agrosystem sites are highlighted using the letter A and experimentally fertilized sites with the letter N to compare with unfertilized plots at the same site.

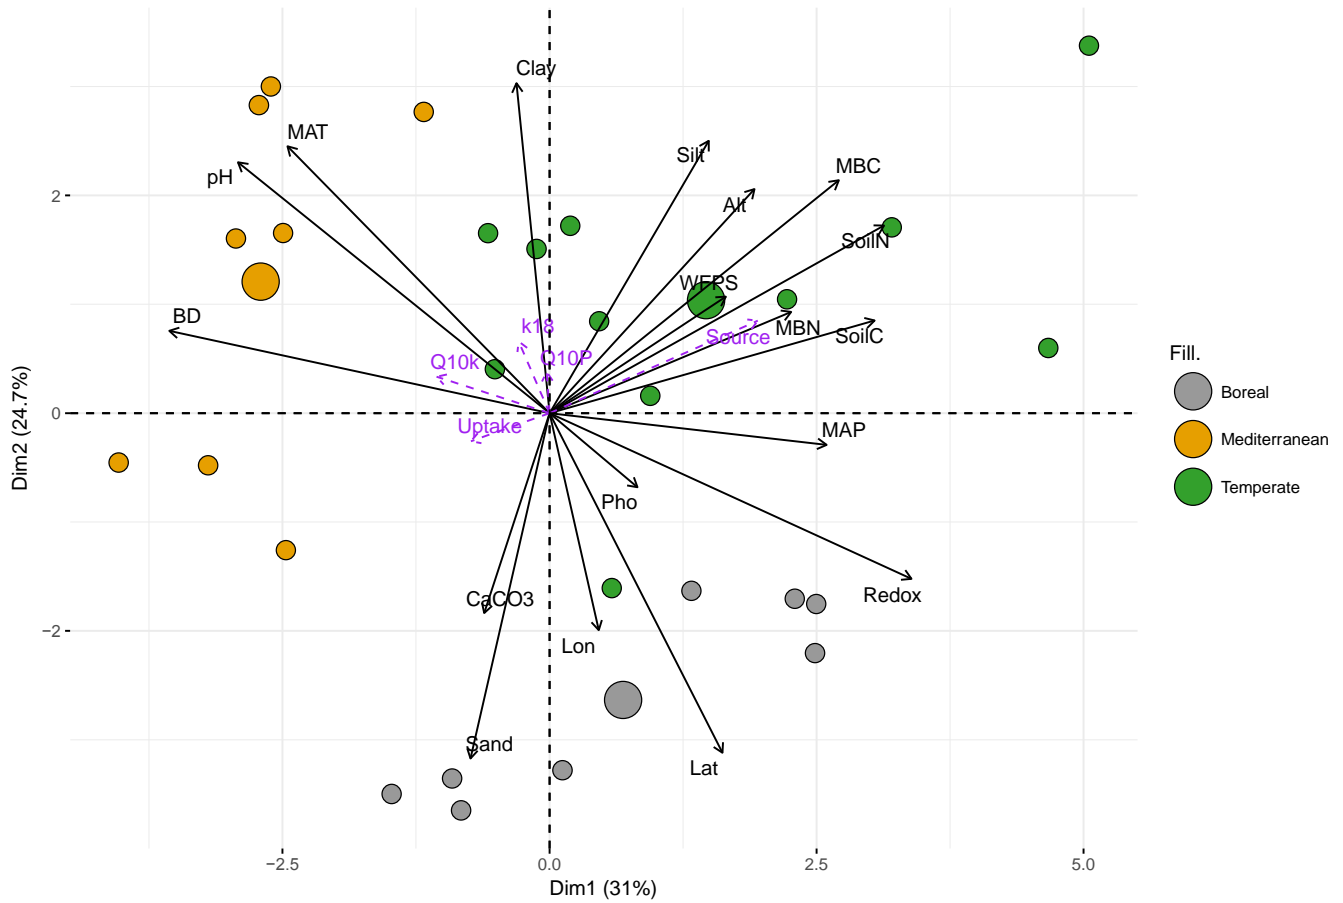

**Figure S5:** Biplot principal component analysis (PCA) of the 27 soils in this study. Each small point represents the mean of the three replicates of one soil coloured by the biome (Boreal, Mediterranean, Temperate), the big points represent the barycentre of each biome. Black arrows are the active variables (standardized physico-chemical properties) used to build the PCA (BD= Bulk density; MBC and MBN = microbial biomass carbon and nitrogen; WFPS = water filled pore space, Alt = altitude, Lon=longitude, Lat=Latitude, MAT= mean annual temperature, MAP= Mean annual precipitation, Pho=Phosphate content).

To investigate the inter-relations between COS fluxes and soil properties, variables of COS fluxes (Source = gross OCS production at 18°C; uptake = gross OCS uptake at 18°C; Q10k and Q10P =  $Q_{10}$  of hydrolysis rate and of the source; and k18= first-order hydrolysis rate constant at 18°C) were fitted as supplementary variables into the PCA using the package R called FactoMineR. The purple arrows are the supplementary variables with the coordinates projected onto the PCA and predicted using only the information provided by the performed PCA on active variables.
